# Supplementary material for: Adsorption of acetylene on a rutile TiO2(110) surface: a low temperature STM study
Source: Royal Society of Chemistry journal article supplement (doi:10.1039/d0cp04803h), 2020-01-01
Supplement: d0cp04803h1.pdf [file d0cp04803h1.pdf]

## Supporting information

### Adsorption of Acetylene on Rutile $\text{TiO}_2(110)$ Surface: A Low Temperature STM Study

Hong Shi, Huihui Liu, Zhe Li, Wenyuan Wang, Xiang Shao\*

*Department of Chemical Physics, CAS Key Laboratory of Urban Pollutant Conversion,  
Synergetic Innovation Center of Quantum Information and Quantum Physics, University of  
Science and Technology of China, Hefei 230026, China*

\* To whom correspondence should be addressed: [shaox@ustc.edu.cn](mailto:shaox@ustc.edu.cn)

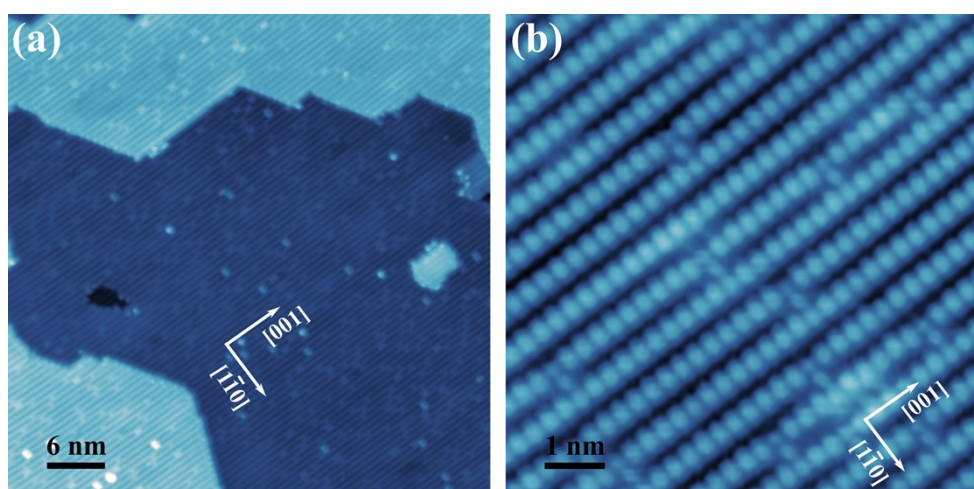

**Figure S1.** (a) STM image of just-prepared  $\text{TiO}_2(110)$  surface. Image size: 50 nm×50 nm. Image condition:  $U=1.0$  V,  $I=110$  pA. (b) Atomic resolution of cleaned  $\text{TiO}_2(110)$  surface. Image size: 8 nm×8 nm. Image condition:  $U=0.6$  V,  $I=180$  pA.

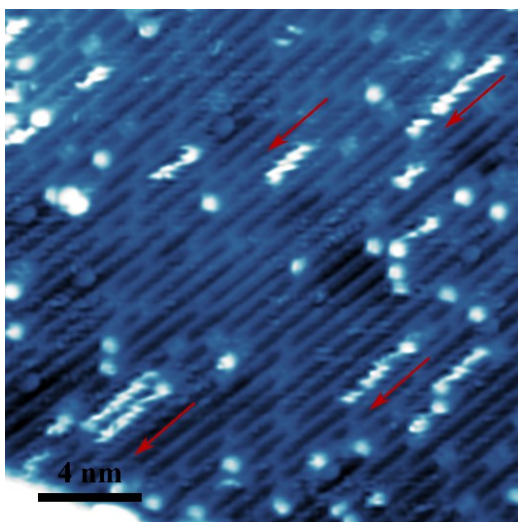

**Figure S2.** STM image of  $C_2H_2$  molecules migration along surface  $Ti_{5c}$  rows. (Indicated by the red arrow). Image size:  $20\text{ nm}\times 20\text{ nm}$ . Image condition:  $U=1.1\text{ V}$ ,  $I=100\text{ pA}$ .

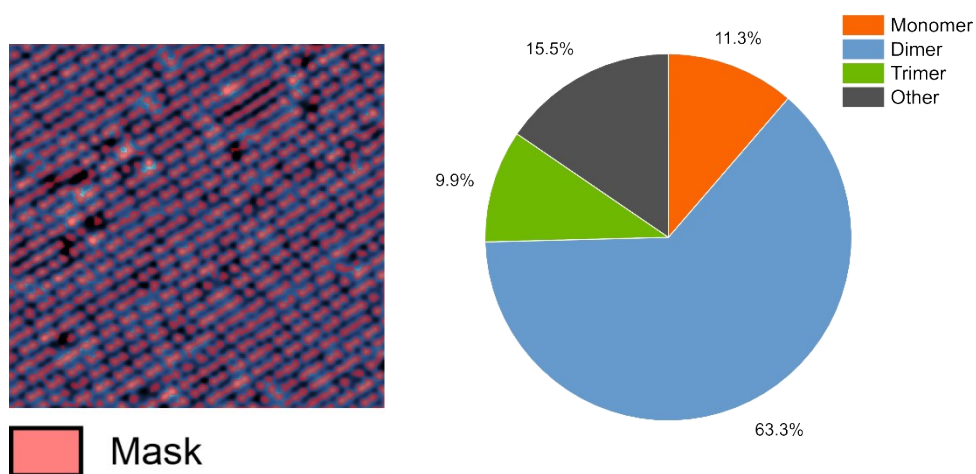

**Figure S3.** The fraction of different surface clusters counted by measuring the cluster size. (monomer:  $<0.1\text{ nm}^2$ , dimer:  $0.1\sim 0.2\text{ nm}^2$ , trimer:  $0.2\sim 0.3\text{ nm}^2$ ). It shows that more than 60% of the surface was covered by  $C_2H_2$  dimer. While the monomers and trimers are both about 10% on the surface. Others are the clusters which are larger than trimer.

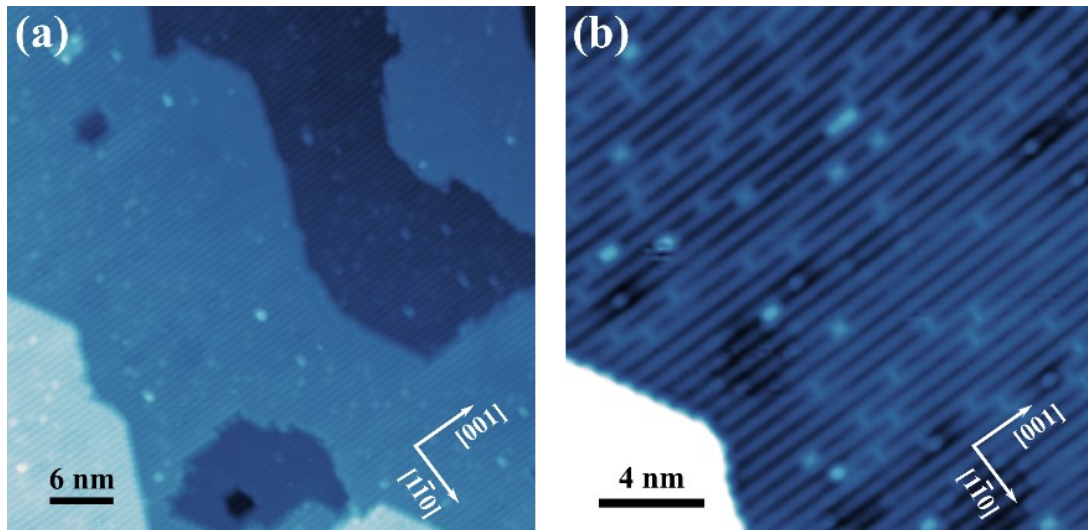

**Figure S4.** STM image of  $C_2H_2$  covered  $TiO_2(110)$  surface annealed to room temperature. (a) Image size: 50 nm $\times$ 50 nm. Image condition:  $U=1.1$  V,  $I=120$  pA. (b) Image size: 20 nm $\times$ 20 nm. Image condition:  $U=1.1$  V,  $I=130$  pA.
